# Supplementary material for: A Cross-Sectional Study of the Impact of Pain Severity on Absenteeism and Presenteeism Among Japanese Full-Time Workers
Source: Springer Nature journal article supplement (doi:10.1007/s40122-022-00408-7), 2022-07-19
Supplement: MOESM1 [file 23283174]

## ORIGINAL RESEARCH

A cross-sectional study of the impact of pain severity on absenteeism and presenteeism among Japanese full-time workers

Authors: Chisato Tanaka, M.D.,<sup>1,2</sup> Kenta Wakaizumi, M.D., Ph.D.,<sup>2,3,\*</sup> Saki Takaoka, M.D.,<sup>2,3</sup> Ko Matsudaira, M.D., Ph.D.,<sup>4</sup> Masaru Mimura, M.D., Ph.D.,<sup>1</sup> Daisuke Fujisawa, M.D., Ph.D.,<sup>1,2</sup> Shizuko Kosugi, M.D., Ph.D.<sup>2,3</sup>

### Affiliations of authors

<sup>1</sup>Department of Neuropsychiatry, Keio University School of Medicine, Tokyo, Japan

<sup>2</sup>Interdisciplinary Pain Center, Keio University Hospital, Tokyo, Japan

<sup>3</sup>Department of Anesthesiology, Keio University School of Medicine, Tokyo, Japan

<sup>4</sup>Department of Medical Research and Management for Musculoskeletal Pain, 22nd Century Medical and Research Center, Faculty of Medicine, The University of Tokyo-Hospital, Tokyo, Japan

\*Corresponding author

Kenta Wakaizumi, M.D., Ph.D.

Keio University School of Medicine

E-mail: kwaka@keio.jp

**Supplementary Table 1** Associations of pain location with absenteeism or presenteeism in individuals with pain (N = 221)

| Pain location                        | Absenteeism |        |    |        | <i>P</i> | Presenteeism |        |      |        |    | <i>P</i> |       |
|--------------------------------------|-------------|--------|----|--------|----------|--------------|--------|------|--------|----|----------|-------|
|                                      | -           |        | +  |        |          | 0            | 1-2    | 3-10 |        |    |          |       |
| <b>Neck and shoulder pain, n (%)</b> | 99          | (56.6) | 24 | (52.2) | 0.594    | 28           | (50.0) | 55   | (61.8) | 40 | (52.6)   | 0.304 |
| <b>Low back pain, n (%)</b>          | 60          | (34.3) | 20 | (43.5) | 0.253    | 17           | (30.4) | 34   | (38.2) | 29 | (38.2)   | 0.569 |
| <b>Knee pain, n (%)</b>              | 32          | (18.3) | 10 | (21.7) | 0.600    | 10           | (17.9) | 21   | (23.6) | 11 | (14.5)   | 0.319 |
| <b>Headache, n (%)</b>               | 17          | (9.7)  | 9  | (19.6) | 0.081    | 3            | (5.4)  | 9    | (10.1) | 14 | (18.4)   | 0.056 |
| <b>Chronic pain, n (%)</b>           | 121         | (69.1) | 34 | (73.9) | 0.525    | 34           | (60.7) | 61   | (68.5) | 60 | (79.0)   | 0.068 |

**Supplementary Table 2** Loadings of measures in the identified principal components

|                               | Work stress | Regulation  | Mental<br>instability | Less support | Home stress  | Life<br>dissatisfaction |
|-------------------------------|-------------|-------------|-----------------------|--------------|--------------|-------------------------|
| <b>Work stress</b>            |             |             |                       |              |              |                         |
| Overload                      | <b>0.78</b> | 0.00        | 0.08                  | -0.03        | 0.29         | 0.06                    |
| Emotional demand              | <b>0.69</b> | -0.08       | 0.28                  | 0.17         | 0.11         | 0.00                    |
| Control                       | <b>0.61</b> | -0.18       | -0.07                 | 0.35         | -0.03        | 0.05                    |
| Excessive                     | <b>0.81</b> | 0.01        | 0.09                  | -0.08        | 0.23         | 0.06                    |
| Compulsive                    | <b>0.61</b> | -0.11       | 0.38                  | 0.11         | 0.04         | 0.09                    |
| <b>MAIA</b>                   |             |             |                       |              |              |                         |
| Attention regulation          | -0.09       | <b>0.86</b> | -0.16                 | -0.08        | -0.08        | 0.02                    |
| Self-regulation               | -0.04       | <b>0.85</b> | -0.22                 | -0.13        | -0.01        | -0.08                   |
| Trusting                      | -0.09       | <b>0.82</b> | -0.21                 | -0.15        | 0.02         | -0.23                   |
| Not-distracting               | -0.30       | 0.09        | <b>-0.72</b>          | -0.05        | -0.04        | -0.07                   |
| Not-worrying                  | -0.16       | 0.28        | <b>-0.73</b>          | -0.04        | -0.16        | -0.06                   |
| <b>K6</b>                     | 0.36        | -0.31       | <b>0.55</b>           | 0.23         | 0.05         | 0.22                    |
| <b>TSK</b>                    | -0.01       | -0.16       | <b>0.67</b>           | 0.19         | 0.02         | -0.01                   |
| <b>Less support</b>           |             |             |                       |              |              |                         |
| Boss                          | 0.24        | -0.10       | 0.04                  | <b>0.83</b>  | -0.10        | 0.09                    |
| Colleague                     | 0.07        | -0.14       | 0.14                  | <b>0.85</b>  | 0.05         | 0.05                    |
| Family                        | -0.05       | -0.09       | 0.27                  | <b>0.67</b>  | 0.24         | 0.19                    |
| <b>Home stress</b>            |             |             |                       |              |              |                         |
| Overload                      | 0.27        | 0.09        | 0.15                  | -0.08        | <b>0.66</b>  | 0.05                    |
| Emotional demand              | 0.09        | -0.04       | 0.31                  | 0.05         | <b>0.69</b>  | 0.15                    |
| Control                       | -0.17       | 0.13        | 0.23                  | -0.16        | <b>-0.63</b> | 0.07                    |
| <b>Dissatisfaction</b>        |             |             |                       |              |              |                         |
| Work                          | 0.28        | -0.21       | 0.07                  | 0.16         | -0.14        | <b>0.79</b>             |
| Home                          | -0.05       | -0.06       | 0.09                  | 0.12         | 0.26         | <b>0.86</b>             |
| <b>Eigenvalue</b>             | 5.80        | 2.34        | 1.63                  | 1.33         | 1.21         | 1.12                    |
| <b>Explained valiance (%)</b> | 29.0        | 11.7        | 8.1                   | 6.7          | 6.0          | 5.6                     |

Numbers with more than 0.5 absolute value were high-lighted. *SEM* standard error of the mean, *BMI* body mass index, *MAIA* multidimensional assessment of interoceptive awareness, *K6* kessler psychological distress scale, *TSK* tampa scale for kinesiophobia.
